## 1 **Morphological Cell Profiling of SARS-CoV-2 Infection Identifies Drug Repurposing** 2 **Candidates for COVID-19**

3 Carmen Mirabelli<sup>1,\*</sup>, Jesse W. Wotring<sup>2,\*</sup>, Charles J. Zhang<sup>2,†</sup>, Sean M. McCarty<sup>2,†</sup>, Reid  
4 Fursmidt<sup>3,†</sup>, Namrata S. Kadambi<sup>3</sup>, Anya T. Amin<sup>3</sup>, Teresa R. O'Meara<sup>1</sup>, Carla D. Pretto<sup>1</sup>, Tristan  
5 Frum<sup>5</sup>, Jason R. Spence<sup>3,5</sup>, Konstantinos D. Alysandratos<sup>6,7</sup>, Jessie Huang<sup>6,7</sup>, Darrell N. Kotton<sup>6,7</sup>,  
6 Christiane E. Wobus<sup>1</sup>, Kevin J. Weatherwax<sup>4,8,9</sup>, George A. Mashour<sup>4,8,10</sup>, Samuel K.  
7 Handelman<sup>3,4</sup>, Matthew J. O'Meara<sup>11</sup>, Jonathan Z. Sexton<sup>2,3,4,8</sup>

8 <sup>1</sup>Department of Microbiology and Immunology, University of Michigan Medical School, Ann Arbor,  
9 MI, 48109, USA

10 <sup>2</sup>Department of Medicinal Chemistry, College of Pharmacy, University of Michigan, Ann Arbor, MI,  
11 48109, USA

12 <sup>3</sup>Department of Internal Medicine, Gastroenterology, Michigan Medicine at the University of  
13 Michigan, Ann Arbor, MI, 48109, USA

14 <sup>4</sup>U-M Center for Drug Repurposing, University of Michigan, Ann Arbor, MI, 48109, USA

15 <sup>5</sup>Department of Cell and Developmental Biology, University of Michigan, Ann Arbor, MI, 48109,  
16 USA

17 <sup>6</sup>Center for Regenerative Medicine of Boston University and Boston Medical Center, Boston, MA,  
18 02118, USA

19 <sup>7</sup>The Pulmonary Center and Department of Medicine, Boston University School of Medicine,  
20 Boston, MA, 02118, USA

21 <sup>8</sup>Michigan Institute for Clinical and Health Research (MICHHR), University of Michigan, Ann Arbor,  
22 MI, 48109, USA

23 <sup>9</sup>College of Pharmacy, University of Michigan, Ann Arbor, MI 48109, USA

24 <sup>10</sup>Department of Anesthesiology, Michigan Medicine at the University of Michigan, Ann Arbor, MI,  
25 48109, USA

26 <sup>11</sup>Department of Computational Medicine and Bioinformatics, University of Michigan, Ann Arbor,  
27 MI, 48109, USA

28 \*These authors contributed equally to this work.

29 †These authors contributed equally to this work.

30

### 31 **Abbreviations:**

32 MOI: multiplicity of infection

33 UMAP: uniform manifold approximation and projection

34 COVID-19: Coronavirus Disease-2019

35 MOA: mechanism of action

36 ROI: region of interest

37 iAEC2: induced pluripotent stem cell (iPSC)-derived alveolar epithelial type 2 cells

38 HCQ: hydroxychloroquine

39

### 40 **Conflicts of interest**

41 Jonathan Sexton is the co-founder of Verge Therapeutics, Inc. and owner of Curl Bio, LLC.

42

43

## 44 **ABSTRACT**

45 The global spread of the severe acute respiratory syndrome coronavirus 2 (SARS-CoV-2), and  
46 the associated disease COVID-19, requires therapeutic interventions that can be rapidly  
47 translated to clinical care. Unfortunately, traditional drug discovery methods have a >90% failure  
48 rate and can take 10-15 years from target identification to clinical use. In contrast, drug  
49 repurposing can significantly accelerate translation. We developed a quantitative high-throughput  
50 screen to identify efficacious single agents and combination therapies against SARS-CoV-2.  
51 Quantitative high-content morphological profiling was coupled with an AI-based machine learning  
52 strategy to classify features of cells for infection and stress. This assay detected multiple antiviral  
53 mechanisms of action (MOA), including inhibition of viral entry, propagation, and modulation of  
54 host cellular responses. From a library of 1,441 FDA-approved compounds and clinical  
55 candidates, we identified 15 dose-responsive compounds with antiviral effects. In particular, we  
56 discovered that lactoferrin is an effective inhibitor of SARS-CoV-2 infection with an  $IC_{50}$  of 308 nM  
57 and that it potentiates the efficacy of both remdesivir and hydroxychloroquine. Lactoferrin also  
58 stimulates an antiviral host cell response and retains inhibitory activity in iPSC-derived alveolar  
59 epithelial cells. Given its safety profile in humans, these data suggest that lactoferrin is a readily  
60 translatable therapeutic adjunct for COVID-19. Additionally, several commonly prescribed drugs  
61 were found to exacerbate viral infection and warrant clinical investigation. We conclude that  
62 morphological profiling for drug repurposing is an effective strategy for the selection and  
63 optimization of drugs and drug combinations as viable therapeutic options for COVID-19  
64 pandemic and other emerging infectious diseases.

## 65 **MAIN**

66 SARS-CoV-2 is an enveloped, positive-sense, single-stranded RNA beta-coronavirus that  
67 emerged in Wuhan, China in November 2019 and rapidly developed into a global pandemic. The  
68 associated disease, COVID-19, has an array of symptoms, ranging from flu-like illness and

69 gastrointestinal distress<sup>1,2</sup> to acute respiratory distress syndrome, heart arrhythmias, strokes, and  
70 death<sup>3,4</sup>. Drug repurposing has played an important role in the search for COVID-19 therapies.  
71 Recently, the FDA issued emergency approval of remdesivir (GS-5734), a prodrug of a nucleoside  
72 inhibitor developed for Ebola virus treatment<sup>5</sup>, and hydroxychloroquine, an aminoquinoline  
73 derivative first developed in the 1940s for the treatment of malaria, for patients with severe  
74 COVID-19. However, there are no established prophylactic strategies or direct antiviral treatments  
75 available to limit SARS-CoV-2 infections and to prevent/cure the associated disease COVID-19.

76  
77 Repurposing of FDA-approved drugs is a promising strategy for identifying rapidly deployable  
78 treatments for COVID-19. Benefits of repurposing include known safety profiles, robust supply  
79 chains, and a short time-frame necessary for development<sup>6</sup>. Additionally, approved drugs serve  
80 as chemical probes to understand the biology of viral infection and can make new associations  
81 between COVID-19 and molecular targets/pathways that influence pathogenesis of the disease.  
82 A complementary approach to standard in vitro antiviral assays is high-content imaging-based  
83 morphological cell profiling. Using morphological cell profiling, it is possible to identify pathways  
84 and novel biology underlying infection, thus allowing for targeted screening around a particular  
85 biological process or targeting of host processes that limit viral infection. This enables the  
86 identification of multiple anti-viral mechanisms, allowing for the rational design of drug  
87 combinations or, conversely, revealing drugs that exacerbate infectivity or are associated with  
88 cytotoxicity.

89  
90 Here, we developed a pipeline for quantitative high-throughput image-based screening of SARS-  
91 CoV-2 infection. We leveraged machine learning approaches to create an assay metric that  
92 accurately and robustly identifies features that predict antiviral efficacy and mechanism of action

93 (MOA). We identified several FDA-approved drugs and clinical candidates with unique antiviral  
94 activity. We further demonstrated that lactoferrin inhibits viral entry and replication, enhances  
95 antiviral host cell response, and potentiates the effects of remdesivir and hydroxychloroquine.  
96 Furthermore, we identified currently prescribed drugs that exacerbate viral infectivity. Collectively,  
97 we present evidence that morphological profiling can robustly identify new potential therapeutics  
98 against SARS-CoV-2 infection as well as drugs that potentially worsen COVID-19 outcomes.

99

### 100 **Morphological profiling reveals unique features associated with SARS-CoV-2 infection**

101 To determine the optimal cell line and appropriate endpoint for antiviral drug screening, we  
102 assessed SARS-CoV-2 infectivity in previously reported permissive cell lines: Vero-E6, Caco-2,  
103 and Huh-7<sup>7</sup>. Viral growth kinetics at a multiplicity of infection (MOI) of 0.2 revealed that Vero-E6,  
104 Caco2, and Huh-7 cells supported viral infection, with peak viral titers at 48 hours post infection  
105 (hrs p.i.) (Supplementary Figure 1A/B). Although the viral load was higher in Vero-E6 cells, Huh-  
106 7 were selected for our morphological drug screen as a human cell line that expresses both ACE2  
107 and TMPRSS2, which are the primary entry factors for SARS-CoV-2<sup>8</sup>. Infection was detectable in  
108 Huh-7 cells at an MOI as low as 0.004 at 48 hrs p.i. (Supplementary Figure 1C), which highlights  
109 the high sensitivity of image-based screening. To identify compounds that inhibit or exacerbate  
110 infection, we selected an MOI of 0.2, leading to a baseline infectivity rate of 20%.

111

112 Morphological cell profiling was enabled through multiplexed staining and automated high-content  
113 fluorescence microscopy. Our multiplexed dye set included markers for SARS-CoV-2  
114 nucleocapsid protein, nuclei (Hoechst 33342), neutral lipids (HCS LipidTox Green), and cell  
115 boundaries (HCS CellMask Orange). These fluorescent probes were chosen to capture a wide  
116 variety of cellular features relevant to viral infectivity, including nuclear morphology, nuclear

117 texture, cytoplasmic and cytoskeletal features, and indicators of cell health. From our initial  
118 profiling we observed three prominent morphological features associated with SARS-CoV-2  
119 infection: the formation of syncytia, increased nucleoli count (Supplementary Figure 1D), and  
120 cytoplasmic protrusions (Figure 1). These features, which are key indicators of SARS-CoV-2  
121 infection in Huh-7, were used to generate our machine learning pipeline for antiviral drug  
122 discovery.

123

## 124 **Machine learning identifies FDA-approved molecules with antiviral activity against SARS-** 125 **CoV-2**

126 To identify compounds with antiviral activity against SARS-CoV-2, we screened a custom library  
127 of 1,441 FDA-approved compounds and rationally included clinical candidates in Huh-7 cells  
128 (Supplementary File 1). Compounds were assessed for their antiviral activity using a CellProfiler-  
129 based image analysis pipeline and a random forest classification algorithm to identify infected  
130 cells and quantify their morphological characteristics (Figure 2A). The random forest classifier  
131 leveraged 660 unique cellular features including measurements of intensity, texture and radial  
132 distribution for each fluorescent channel (nuclei, cytoplasm, lipid, virus). From the primary  
133 quantitative high-throughput screening (qHTS), hits were defined as compounds with consistent  
134 decreases in viral infectivity in at least three of the tested concentrations (50 nM, 250 nM, 500 nM,  
135 1000 nM and 2000 nM) as well as minimal cytotoxicity. This approach for hit identification was  
136 intentionally designed to be broad to minimize false negatives and maximize our list of efficacious  
137 compounds which would later be refined. Our first-pass qHTS approach identified 132 compounds  
138 with moderate dose-responsive antiviral behavior between 50 nM and 2  $\mu$ M, and successfully  
139 eliminated compounds without any significant activity or obvious cytotoxicity.

140

141 In confirmatory screening, 10-point, two-fold dilution dose-response experiments were performed  
142 in triplicate on the 132 qHTS hits, with validation of dose-responsive efficacy for 15 compounds  
143 below 1  $\mu$ M potency (Supplementary Table 1 and Figure 2B). These hits include nine that are  
144 novel *in vitro* observations (lactoferrin, S1RA, entecavir, lomitapide, metoclopramide, bosutinib,  
145 thioguanine, fedratinib, and Z-FA-FMK), and six that have been previously identified to have  
146 antiviral activity (amiodarone, verapamil, gilteritinib, clofazimine<sup>9,10</sup>, niclosamide<sup>11</sup>, and  
147 remdesivir). In addition to antiviral drug hits, we also identified several compounds that appear to  
148 exacerbate SARS-CoV-2 infection, including trametinib, binimetinib and cobimetinib -potent MEK  
149 inhibitors used to treat metastatic melanoma- and the Parkinson's disease drugs carbidopa,  
150 methyldopa and levodopa (Supplementary Figure 2).

151

## 152 **Cell level feature clustering reveals potential mechanisms of action for lead compounds**

153 In contrast to standard single-endpoint *in vitro* assays, morphological cell profiling allows for the  
154 efficient visualization and quantitation of biological characteristics of viral infection and cytotoxicity.  
155 To assist with mechanistic determination, we used dimensionality reduction via the non-linear  
156 uniform manifold approximation and projection (UMAP) embedding, which projects the cellular  
157 feature vector into a 2-dimensional plot to observe clusters of cells based on their distinct  
158 morphological features<sup>12</sup>. Millions of cells were observed in the UMAP embedding through a range  
159 of drug concentrations alongside negative and positive controls to observe perturbations in  
160 specific morphological clusters (Supplementary Figure 3B).

161 In the UMAP embedding, we identified 15 regions of interest (ROI) with high cell density (Figure  
162 3B). A broad density region (ROIs 10,15) contained uninfected cells with satellite populations  
163 having characteristic morphologies including cell division (ROI 6) and accumulation of lipids  
164 towards the periphery of the cell (ROI 12). A large disconnected region (ROIs 1-4) contained

165 individually infected cells (ROI 4), infected cells in syncytia (ROI 3), and cells adjacent to infected  
166 cells (ROIs 1,2) (Figure 3C). Pseudotime of the viral infection progression can be inferred through  
167 inspection of cluster populations where cells begin in the main cluster body (ROIs 10,15) and  
168 traverse to the infected cluster (ROIs 1-4) where there is punctate viral signal (ROI 1) which  
169 progress to isolated infected cells characterized by homogenous nucleocapsid staining  
170 throughout the cytoplasm (ROI 2), and ends with infection of surrounding cells and the formation  
171 of syncytia (ROIs 3,4). All efficacious compounds deplete ROIs 1-4 and thioguanine, clofazimine,  
172 S1RA and giliteritinib show differences in the UMAP cluster dynamics (Supplementary Figure 3B)  
173 suggestive of differing MOAs.

174

#### 175 **Lactoferrin blocks SARS-CoV-2 replication at different stages of the viral cycle**

176 One of the most efficacious hits identified from our screen was lactoferrin, a protein found in milk  
177 and other secretory fluids<sup>13</sup>. We determined that lactoferrin has dose-dependent antiviral activity  
178 through a range of MOIs (Figure 4A and B). Previous work on lactoferrin in the context of infection  
179 with SARS-CoV-1 suggests that it blocks viral entry by binding heparan sulfate proteoglycans that  
180 are important for early viral attachment<sup>13</sup>. Our studies showed that lactoferrin blocks SARS-CoV-  
181 2 infection through entry inhibition and is also capable of rescuing infection when added 1 or 24  
182 hrs p.i. (Figure 4B). Lactoferrin has been proposed to enhance innate interferon responses to limit  
183 viral replication within host cells<sup>14</sup>. Upon treatment, we observed a dose-dependent reduction of  
184 viral replication (Figure 4C), which was consistent with elevated mRNA levels of IFN $\beta$  and  
185 interferon-stimulated genes (ISG15, MX1, Viperin and IFITM3) in lactoferrin-treated Huh-7 cells  
186 (Figure 4D). Interestingly, we detected a robust antiviral effect by both holo and apolactoferrin,  
187 the latter being the component of widely available dietary supplements. To rule out a mode of  
188 action that involved a general iron depletion mechanism, we tested the protein transferrin and

189 found that it was devoid of any anti-SARS-CoV-2 activity at the highest concentration of 2.3  $\mu$ M  
190 (Figure 4E). Lastly, we tested the efficacy of lactoferrin in physiologically relevant iPSC-derived  
191 alveolar epithelial type 2 cells (iAEC2s)<sup>15,16</sup>. Consistent with our findings in Huh-7 cells,  
192 pretreatment of iAEC2s with lactoferrin resulted in a significant reduction in the proportion of  
193 SARS-CoV-2 infected cells at MOI 10 (Figure 4F).

194  
195 A clinically effective strategy for antiviral therapies uses a combinatorial (or “drug cocktail”)  
196 approach, where compounds with varying MOAs are concomitantly used to target different stages  
197 in the viral life cycle and to minimize the risk of drug resistance from single-agent selective  
198 pressure. This is especially true for RNA viruses, which are highly variable and can develop drug-  
199 resistance<sup>17</sup>. Given the pronounced single-agent efficacy of lactoferrin, we tested whether  
200 combinations with remdesivir or hydroxychloroquine could improve the overall antiviral activity.  
201 We found that lactoferrin potentiates the efficacy of both remdesivir (Figure 4G and  
202 Supplementary Figure 4A) and hydroxychloroquine (Figure 4H and Supplementary Figure 4B),  
203 which are currently explored treatments for SARS-CoV-2 infection. Therefore, combination  
204 therapy with lactoferrin could be beneficial in the management of the COVID-19 pandemic by  
205 reducing toxicity (e.g., hydroxychloroquine) or consumption (e.g., remdesivir).

## 206 **DISCUSSION**

207 In this study, we developed an experimental workflow based on high-content imaging and  
208 morphological profiling that allows for rapid screening of FDA-approved compounds, leveraging  
209 machine learning to determine potential MOA. We identified 15 FDA-approved compounds that  
210 limit SARS-CoV-2 infection *in vitro*. Of these, six were previously reported and serve as a  
211 benchmark validation of our endpoints and experimental approach, and nine were hitherto  
212 unknown. We demonstrate that this approach is versatile (i.e., it can be applied to both



213 transformed and more physiologically-relevant non-transformed cell lines) and can identify the  
214 emergent properties of the infection as well as novel phenotypes that can be perturbed through  
215 chemical inhibition.

216  
217 A high-content morphological cell profiling approach is superior to image cytometry (tabulating  
218 percent positive) and plate reader assays for selecting and prioritizing drugs for repurposing. Here,  
219 viral staining is not merely an absolute measure for viral infection (or inhibition) but the starting  
220 point for a detailed investigation of infection trajectories and observations of numerous phenotypic  
221 targets, including inhibition of syncytia formation, viral entry, or viral replication, and modulation  
222 of the host cell. We report compounds with strong antiviral activity against SARS-CoV-2 and also  
223 their putative MOA.

224  
225 The UMAP embedding was highly effective at visualizing the virally infected cell population and  
226 the progression of the viral infection trajectory was clearly visible. We gained insight into the  
227 putative antiviral MOAs via inspection of the cluster populations. For thioguanine and clofazimine,  
228 increasing concentrations appear to suppress isolated single infected cells (ROI 4) while a small  
229 number of syncytia (ROI 3) are still observable (Supplementary Figure 3B), suggesting a  
230 replication inhibition MOA. This observation is consistent with the established MOA of both drugs  
231 as inhibitors of nucleic acid synthesis<sup>18,19</sup>. S1RA reduces ROIs 1-4 evenly, but ROI 13 increases  
232 (Supplementary Figure 3B: S1RA) and is characterized by increased cytoplasmic nucleic acid  
233 staining (Supplementary Figure 3A: ROI 13), suggesting a host-modulation MOA. Lastly,  
234 gilteritinib demonstrates an increase in ROI 12 with treatment (Supplementary Figure 3B:  
235 gilteritinib), a cell cluster defined by large and distributed lipid accumulation (Supplementary  
236 Figure 3A: ROI 12). Lipid accumulation, in liver-derived Huh-7 cells, is associated with cytotoxicity  
237 and is consistent with reduction in viability with escalating dose (Figure 2B)<sup>20</sup>.

238

239 Importantly, our study identified drugs that implicate new molecular targets/pathways in the  
240 pathogenesis of SARS-CoV-2 and produce clinically testable and readily translatable hypotheses.  
241 As an example, we observed a dose dependent antiviral activity of metoclopramide, a potent  
242 Dopamine Receptor D2 antagonist used to treat gastroesophageal reflux disease and prevent  
243 other gastrointestinal symptoms, including nausea and vomiting<sup>21</sup>. Gastrointestinal symptoms  
244 have been increasingly reported in more than half of the patients infected by SARS-CoV-2.  
245 Notably, investigational drugs like hydroxychloroquine, lopinavir-ritonavir, tocilizumab and others  
246 can be associated with gastrointestinal and hepatic adverse events and hence are not ideal for  
247 patients already experiencing severe GI symptoms<sup>22</sup>. Metoclopramide therefore represents an  
248 interesting dual-target therapeutic option for COVID-19 patients. Interestingly, the pro-  
249 dopaminergic drugs carbidopa, levodopa, and methyldopa promote infection (Supplementary  
250 Figure 2), suggesting a dopamine-mediated contribution to viral entry or replication. Additionally,  
251 all MEK inhibitors exacerbated viral infection up to 300% indicating a causal role of MEK in SARS-  
252 CoV-2 pathogenesis. These *in vitro* observations should be validated through clinical research  
253 that examines whether concomitant presence of drug and SARS-CoV-2 exacerbates COVID-19.  
254  
255 As most FDA-approved drugs target human molecular targets, our screen helped identify crucial  
256 host factors involved in SARS-CoV-2 infection. Z-FA-FMK, an irreversible inhibitor of cysteine  
257 proteases, including cathepsins B, L, and S<sup>23</sup>, exhibited potent antiviral activity. A recent report  
258 using a pseudovirus indicated cathepsin L is an entry factor of SARS-CoV-2<sup>24</sup>. The antiviral effect  
259 of Z-FA-FMK suggests that cathepsin L is a requirement also in the context of SARS-CoV-2  
260 infection and suggests that this molecule could be a useful investigational tool to study virus entry.  
261 Similarly, fedratinib is an orally bioavailable semi-selective JAK2 inhibitor, approved by the FDA  
262 in 2019 for myeloproliferative neoplasm, a rare blood cancer that causes clotting and fibrosis<sup>25</sup>.  
263 JAK-inhibitors have been proposed for COVID-19 to specifically inhibit TH17-mediated  
264 inflammatory responses<sup>26,27</sup>. In addition, JAK-inhibitors have been proposed to block numb-

265 associated kinase responsible for clathrin-mediated viral endocytosis<sup>28</sup>. Several JAK-inhibitors  
266 are currently evaluated in clinical trials for COVID-19 management, including with baricitinib<sup>29</sup>,  
267 jakotinib (ChiCTR2000030170), and ruxolitinib (ChiCTR2000029580). Further studies examining  
268 these Jak-inhibitors could serve as useful tools in the future to elucidate the involvement of the  
269 innate immune response in SARS-CoV-2 infection.

270  
271 The sigma receptors (SigmaR1/R2) are permissive chaperones that mediate endoplasmic  
272 reticulum stress response and lipid homeostasis<sup>30</sup>, processes that have been implicated in early  
273 stages of hepatitis C viral infection in Huh-7 cells<sup>31</sup> and coronavirus pathogenesis<sup>32</sup>. We identified  
274 two sigma receptor modulators amiodarone<sup>33</sup> (SigmaR1 IC<sub>50</sub>: 1.4 nM, SigmaR2 IC<sub>50</sub>: 1 nM), and  
275 S1RA<sup>34</sup> (E-52862; SigmaR1 IC<sub>50</sub>: 17 nM antagonist, SigmaR2 IC<sub>50</sub>: > 1 μM) with potent antiviral  
276 activity, demonstrating IC<sub>50</sub> values of 52 nM and 222 nM, respectively, with limited cell toxicity.  
277 Amiodarone is approved for treatment of arrhythmias but, like hydroxychloroquine, has potent  
278 cardiotoxic side effects through inhibition of the hERG ion channel<sup>35</sup> that limit therapeutic potential.  
279 S1RA has completed phase II clinical trials for the treatment of neuropathic pain<sup>36,37</sup>. Although  
280 Gordon *et al.* identified several other sigmaR1/R2 modulators that inhibited SARS-CoV-2 infection  
281 in Vero-E6 cells, antiviral activity for S1RA was not observed<sup>38</sup>. This suggests that the activity of  
282 S1RA is dependent on host cell factors specific to each cell line and, promisingly, that human  
283 cells may be more responsive to this compound.

284  
285 Most noteworthy, our screen demonstrates lactoferrin as a SARS-CoV-2 inhibitor *in vitro* with  
286 multimodal efficacy. We showed efficacy in multiple cell types, including a non-transformed and  
287 clinically relevant iPSC-derived model of alveolar epithelium. Lactoferrin gene expression has  
288 been shown previously to be highly upregulated in response to SARS-CoV-1 infection<sup>39</sup> and, in  
289 addition to enhancing natural killer cell and neutrophil activity, lactoferrin blocks viral entry through  
290 binding to heparan sulfate proteoglycans. Interestingly, lactoferrin retains anti-SARS-CoV-2

291 activity 24 hrs p.i., which suggests additional MOA other than simple entry inhibition. Although we  
292 cannot conclude a definitive and complete MOA, we show significant host cell modulation through  
293 increased expression of several interferon-stimulated genes upon treatment with lactoferrin.  
294 Additionally, lactoferrin has been previously shown to decrease the production of IL-6<sup>40</sup>, which is  
295 one of the key players of the “cytokine storm” produced by SARS-CoV-2 infection<sup>41,42</sup>. Importantly,  
296 we found that lactoferrin retains activity in both the holo and apo forms, the latter being the  
297 component of orally available lactoferrin supplements. Orally available lactoferrin could be  
298 especially effective in mitigating the gastrointestinal symptoms that are present in COVID-19  
299 patients<sup>43</sup>. The mechanisms may be similar to how lactoferrin reduces human norovirus infection  
300 through induction of innate immune responses<sup>44</sup>, especially as lactoferrin gene polymorphisms  
301 are associated with increased susceptibility to infectious diarrhea<sup>45</sup>. If lactoferrin reduces viral load  
302 in the GI tract, it could reduce fecal-oral transmission of COVID-19<sup>46</sup>.

303  
304 Combination therapies are likely to be required for effectively treating SARS-CoV-2 infection, and  
305 this approach has already shown some promise. For example, combination therapy with  
306 interferon beta-1b, lopinavir–ritonavir, and ribavirin showed efficacy against SARS-CoV-2 in a  
307 prospective, open-label, randomized, phase 2 trial<sup>47</sup>. We demonstrated in our study that lactoferrin  
308 potentiates the antiviral activity of both remdesivir and hydroxychloroquine and could be used as  
309 a combination therapy with these drugs, which are currently being used or studied for the  
310 treatment of COVID-19. Due to its wide availability, limited cost and lack of adverse effects,  
311 lactoferrin could be a rapidly deployable option for both prophylaxis and the management of  
312 COVID-19.

313  
314 Although our findings are promising, further studies are needed to confirm their efficacy in other  
315 representative *in vitro* cell lines and/or clinical studies. UMAP analysis provides limited insight to

316 MOA and serve as a basis for future pharmacological studies specific to our compounds in  
317 treatment of SARS-CoV-2. These studies are currently ongoing.

318  
319 In conclusion, high-content morphological cell profiling for drug repurposing screening enabled  
320 the identification of both novel antivirals efficacious against SARS-CoV-2 and compounds that  
321 possibly exacerbate SARS-CoV-2 infection. Furthermore, in contrast to other drug repurposing  
322 studies, the assay reported here allowed for the identification of potential MOA, including host cell  
323 responses. This approach to preclinical testing has promise for identifying other anti-SARS-CoV-  
324 2 drugs, rationally designing therapeutic combinations with multiple MOAs, and deployment of  
325 these new combinations in a rapid and systemic fashion.

326  
327 Supplementary Information is available for this paper.

328  
329 Correspondence and requests for materials should be addressed to [jzsexton@umich.edu](mailto:jzsexton@umich.edu)

330  
331

## 332 **ACKNOWLEDGEMENTS**

333 Funding: University of Michigan Institute for Clinical and Health Research (MICHR) (NCATS -  
334 UL1TR002240) and its Center for Drug Repurposing. JZS is supported by the National Institute  
335 of Diabetes and Digestive and Kidney Diseases (R01DK120623). JWW is supported by the  
336 pharmacological sciences training program (PSTP) T32 training grant. CM is supported by Marie-  
337 Slodowska Curie individual fellowship (GA - 841247) and MICHR Postdoctoral Translational  
338 Scholars Program. KDA is supported by the I.M. Rosenzweig Junior Investigator Award from the  
339 Pulmonary Fibrosis Foundation. JRS is supported by the National Heart, Lung, and Blood Institute  
340 (NHLBI – R01HL119215), by the NIAID Novel Alternative Model Systems for Enteric Diseases

341 (NAMSED) consortium (U19AI116482) and by grant number CZF2019-002440 from the Chan  
342 Zuckerberg Initiative DAF, an advised fund of Silicon Valley Community Foundation.

343  
344 The authors would like to thank Matthew Chess for Amazon AWS support, Kevin Yan and Peyton  
345 Uhl at Yokogawa for imaging support, Nick Santoro at the University of Michigan Center for  
346 Chemical Genomics. We thank David Egan and Wienand Omta from Core Life Analytics for  
347 assisting high content data analytics as well as Philip Cheung and Brian Bolt at ReFactor  
348 Biosciences for assistance with HTS data registration. Finally, we thank Tracey Schultz and  
349 Dianne Jazdyk for project management.

350

## 351 **METHODS**

352 **Cells and Virus.** Vero E6, Caco2 and Huh7 cells were maintained at 37°C with 5% CO<sub>2</sub> in  
353 Dulbecco's Modified Eagle's Medium (DMEM; Welgene), supplemented with 10% heat-  
354 inactivated fetal bovine serum (FBS), HEPES, non-essential amino-acids, L-glutamine and 1X  
355 Antibiotic-Antimycotic solution (Gibco). iPSC (SPC2 iPSC line, clone SPC2-ST-B2, Boston  
356 University) derived alveolar epithelial type 2 cells (iAEC2s) were differentiated as previously  
357 described and maintained as alveolospheres embedded in 3D Matrigel in "CK+DCI" media, as  
358 previously described (Jacob et al. 2019). iAEC2s were passaged approximately every two weeks  
359 by dissociation into single cells via the sequential application of dispase (2mg/ml, Thermo Fisher  
360 Scientific, 17105-04) and 0.05% trypsin (Invitrogen, 25300054) and re-plated at a density of 400  
361 cells/ $\mu$ l of Matrigel (Corning, 356231), as previously described (Jacob et al. 2019). SARS-CoV-2  
362 WA1 strain was obtained by BEI resources and was propagated in Vero E6 cells. Viral titers were  
363 determined by TCID<sub>50</sub> assays in Vero E6 cells (Reed and Muench method) by microscopic  
364 scoring. All experiments using SARS-CoV-2 were performed at the University of Michigan under  
365 Biosafety Level 3 (BSL3) protocols in compliance with containment procedures in laboratories

366 approved for use by the University of Michigan Institutional Biosafety Committee (IBC) and  
367 Environment, Health and Safety (EHS).

368  
369 **Viral Quantification.** Vero E6, Caco2 and Huh7 cells were seeded in a 48-well plate at  $2 \times 10^4$   
370 cells/well incubated overnight at  $37^\circ\text{C}$  with 5%  $\text{CO}_2$ . Cells were then infected with SARS-CoV-2  
371 WA1 at a multiplicity of infection (MOI) of 0.2. One hour after infection, cells were harvested (day  
372 0 of infection) or kept at  $37^\circ\text{C}$  for 1, 2 and 3 days p.i. Viral titer determination was performed by  
373 TCID50 assay on Vero E6 cells of the total virus (supernatant and intracellular fraction).  
374 Alternatively, cells were harvested with Trizol and total cellular and viral RNA was extracted with  
375 the ZymoGen Direct-zol RNA extraction kit. Viral RNA was quantified by RT-qPCR using the  
376 2019-nCoV CDC qPCR Probe Assay and the probe set N1 (IDT technologies). IFN $\beta$ , viperin, MX1,  
377 ISG15, IFITM3 and the housekeeping gene GAPDH mRNA levels were quantified by qPCR with  
378 SsoAdvanced™ Universal SYBR® Green Supermix (Bio-Rad) with specific primers (IFN $\beta$ : F-  
379 TTGACATCCCTGAGGAGATTAAGC, R- TCCCACGTACTCCA ACTTCCA; MX1: F-  
380 CCAGCTGCTGCATCCCACCC, R-AGGGGCGCACCTT CTCCTCA; ISG15: F-  
381 TGGCGGGCAACGAATT, R- GGGTGATCTGCGCCTTCA; IFITM3: F-TCCCAC  
382 GTACTCCA ACTTCCA, R-AGCACCAGAAACACGTGCACT; GAPDH: F-  
383 CTCTGCTCCTCCTGTTTCGAC, R-GCGCCCCACCAAGCTCAAGA). Fold increase was  
384 calculated by using the  $\Delta\Delta\text{Ct}$  method over non-infected untreated Huh-7.

385  
386 **Viral Infectivity Assay.** 384-well plates (Perkin Elmer, 6057300) were seeded with Huh-7 cells  
387 at 3000 cells/well and allowed to adhere overnight. Compounds were then added to the cells and  
388 incubated for 4 hours. The plates were then transferred to BSL3 containment and infected with  
389 SARS-CoV-2 WA1 at a multiplicity of infection (MOI) of 0.2 in a  $10 \mu\text{L}$  addition with shaking to  
390 distribute virus. After one hour of absorption, the virus inoculum was removed and media replaced  
391 with fresh compound. Uninfected cells and vehicle-treated cells were included as positive and

392 negative control, respectively. Two days post-infection, cells were fixed with 4% PFA for 30  
393 minutes at room temperature, permeabilized with 0.3% Triton X-100 and blocked with antibody  
394 buffer (1.5% BSA, 1% goat serum and 0.0025% Tween 20). The plates were then sealed, surface  
395 decontaminated, and transferred to BSL2 for staining with the optimized fluorescent dye-set: anti-  
396 nucleocapsid SARS-CoV-2 antibody (Antibodies Online, Cat# ABIN6952432) overnight treatment  
397 at 4C followed by staining with secondary antibody Alexa-647 (goat anti-mouse, Thermo Fisher,  
398 A21235), Hoechst-33342 Pentahydrate (bis-Benzimide) for nuclei staining (Thermo Fisher,  
399 H1398), HCS LipidTOX™ Green Neutral Lipid Stain (Thermo Fisher, H34475), and HCS  
400 CellMask™ Orange for cell delineation (Thermo Fisher H32713). iAEC2 maintained in 3D culture  
401 were dissociated to single cells and seeded in collagen coated 384-well plates at a seeding  
402 density of 8000 cells/well in the presence of 10  $\mu$ M Y-27632 for the first 48 hours after plating  
403 (APExBIO, A3008), and grown to confluence over 72 hours. The following infection, compound  
404 treatment, and fixing was identical to that of Huh-7. Staining protocol for the iAEC2s differed  
405 slightly with the addition of an anti-acetylated tubulin primary antibody (Cell Signaling, 5335),  
406 instead of HCS CellMask Orange, and the use of an additional secondary Alexa 488 antibody  
407 (donkey anti-rabbit, Jackson ImmunoResearch, 711-545-152).

408  
409 **Compound Library.** The compound library deployed for drug screening was created using the  
410 FDA-Approved Drugs Screening Library (Item No. 23538) from Cayman Chemical Company. This  
411 library of 875 compounds was supplemented with additional FDA approved drugs and rationally  
412 included clinical candidates from other vendors including MedChemExpress, Sigma Aldrich, and  
413 Tocris. Our library was formatted in five 384-well compound plates and was dissolved in DMSO  
414 at 10 mM. Hololactoferrin (Sigma Aldrich, L4765), apolactoferrin (Jarrow Formulas, 121011) and  
415 transferrin (Sigma Aldrich, T2036) were handled separately and added manually in cell culture  
416 media. Dilution plates were generated for qHTS at concentrations of 2 mM, 1 mM, 500  $\mu$ M, 250  
417  $\mu$ M and 50  $\mu$ M.



418

419 **qHTS Primary Screen and Dose Response Confirmation.** For the qHTS screen, compounds  
420 were added to cells using a 50 nL pin tool Caliper Life Sciences Sciclone ALH 3000 Advanced  
421 Liquid Handling system at the University of Michigan Center for Chemical Genomics (CCG).  
422 Concentrations of 2  $\mu$ M, 1  $\mu$ M, 500 nM, 250 nM and 50 nM were included for the primary screen.  
423 Post qHTS screen, all compounds were dispensed using an HP D300e Digital Compound  
424 Dispenser and normalized to a final DMSO concentration of 0.1% DMSO. Confirmation dose  
425 response was performed in triplicate and in 10-point:2-fold dilution.

426

427 **Imaging.** Stained cell plates were imaged on both Yokogawa CQ1 and Thermo Fisher CX5 high  
428 content microscopes with a 20X/0.45NA LUCPlan FLN objective. Yokogawa CQ1 imaging was  
429 performed with four excitation laser lines (405nm/488nm/561nm/640nm) with spinning disc  
430 confocal and 100ms exposure times. Laser power was adjusted to yield optimal signal to noise  
431 ratio for each channel. Maximum intensity projection images were collected from 5 confocal  
432 planes with a 3 micron step size. Laser autofocus was performed and nine fields per well were  
433 imaged covering approximately 80% of the well area. The Thermofisher CX5 with LED excitation  
434 (386/23nm, 485/20nm, 560/25nm, 650/13nm) was also used and exposure times were optimized  
435 to maximize signal/background. Nine fields were collected at a single Z-plane as determined by  
436 image-based autofocus on the Hoechst channel. The primary qHTS screen was performed using  
437 CX5 images and all dose-response plates were imaged using the CQ1.

438

439 **Image Segmentation and feature extraction.** The open source CellProfiler software was used  
440 in an Ubuntu Linux-based distributed Amazon AWS cloud implementation for segmentation,  
441 feature extraction and results were written to an Amazon RDS relational database using MySQL.  
442 A pipeline was developed to automatically identify the nuclei, cell, cytoplasm, nucleoli, neutral

443 lipid droplets and syncytia for feature extraction. Multiple intensity features and radial distributions  
444 were measured for each object in each channel and cell size and shape features were measured.  
445 Nuclei were segmented using the Hoechst-33342 image and the whole cell mask was generated  
446 by expanding the nuclear mask to the edge of the Cell Mask Orange image.

447  
448 **Data Pre-Processing.** Cell level data were pre-processed and analyzed in the open source  
449 Knime analytics platform<sup>48</sup>. Cell-level data was imported into Knime from MySQL, drug treatment  
450 metadata was joined and features were centered and scaled. Features were pruned for low  
451 variance (<5%) and high correlation (>95%) and resulted in 660 features per cell.

452  
453 **Statistical methods and hypothesis testing.** Dose-response curves were fit and pairwise  
454 differences between experimental conditions were tested using Prism (Graphpad Software,  
455 San Diego, CA, USA). Other statistical tests were performed in the statistical programming  
456 language and environment R.

457  
458 **Machine Learning - Infectivity score and field-level scoring.** Multiple logistic regression  
459 as implemented in the statistical language and environment R was used to identify features  
460 characteristic of cells within infected wells. Models were fit to cells from infected and  
461 uninfected control wells in the first five plate-series of the quantitative high throughput screen.  
462 As an independent benchmark, these logistic regression models were validated against a  
463 manually selected set of individual infected and uninfected cells; features which degraded  
464 performance on the benchmark were excluded from the model. The final model included only  
465 virus channel intensity features in the cell and cytoplasm ROIs. As a threshold for initial

466 classification, the minimum value from virus-infected cells in the benchmark was used; the  
467 final decision rule is given in Eq. 1.

468

469 (Eq.1) : A cell is infected if ( Cells\_Intensity\_IntegratedIntensityEdge\_Virus × 0.1487025 +  
470 Cells\_Intensity\_MeanIntensityEdge\_Virus × -38.40196 +  
471 Cells\_Intensity\_MaxIntensityEdge\_Virus × 42.70269 +  
472 Cytoplasm\_Intensity\_StdIntensity\_Virus × 42.54849 ) ≥ 1.525285

473

474 Then, individual field images from the infected control were categorized as confirmed-infected  
475 when the mean feature values, across all cells in the field, were above the threshold in Eq. 1.  
476 Using mean values for all 660 cell-profiler features in each field, a random forest classifier  
477 was trained to predict a probability of membership in the category of uninfected control fields  
478 vs confirmed-infected fields. The output of this random forest classifier is reported as  
479 “Probpos” (for the positive, uninfected control), throughout. Field level mean/median feature  
480 values were computed and a random forest model was fit between the positive control (32  
481 uninfected wells) and the negative control (32 infected wells, 0.1% DMSO vehicle treated)  
482 with 80/20 cross validation. The compound treated wells were scored with the RF model and  
483 the efficacy score was normalized to the individual plate.

484

485 **UMAP embedding.** The `embed_umap` application of MPLearn (v0.1.0,  
486 <https://github.com/momeara/MPLearn>) was used to generate UMAP embeddings. Briefly, each  
487 for a set of cells, each feature was per-plate standardized and jointly orthogonalized using  
488 `sklearn.IncrementalPCA(n_components=379, batch_size=1000)`. Then features were embedded

489 into 2-dimensions using umap-learn (v0.4.1) (McInnes et al. 2018) with  
490 umap.UMAP(n\_components=2, n\_neighbors=15, min\_dist=0, init='spectral', low\_memory=True,  
491 verbose=True). Embeddings were visualized using Holoviews Datashader (v1.12.7)<sup>49</sup>, using  
492 histogram equalization and the viridis color map. Visualizing subsets was done in JMP Pro 14.

493

494 **Data analytics.** HC Stratominer (Core Life Analytics, Utrecht NL) was used as an independent  
495 method for hit-calling and performs fully automated/streamlined cell-level data pre-processing and  
496 score generation. IC Stratominer was also used to fit dose response curves for qHTS.  
497 Compound registration and assay data registration were performed using the open source  
498 ACAS platform (Refactor BioSciences github <https://github.com/RefactorBio/acas>).

499

500 **Dose-response analysis and compound selection.** In qHTS screening, a compound was  
501 selected to be carried forward into full dose response confirmation when meeting one of the  
502 following criteria: 1) Probpos greater than 0.75 for the median field in at least three concentrations,  
503 with per-field cell counts at least 60% of the positive control, and without an observed standard  
504 deviation in Probpos across-fields-in-the-well of 0.4 or greater, 2) a dose-response relationship  
505 with Probpos was observed (by inspection) across the five concentrations tested, including  
506 compounds with Propbos greater than 0.90 at the two highest concentrations, or 3) compounds  
507 of interest not meeting this criteria were carried forward if reported positive in the literature or were  
508 being evaluated in clinical trials for COVID-19.

509

510 **Dose response analysis in the confirmation and combinatorial screening.** Due to the spatial  
511 inhomogeneity of infected cells across a single well, approximately half of the fields were  
512 undersaturated, leading to a consistent distribution in Probpos that saturates in the top third of 27

513 rank-ordered fields (from 9 fields and triplicate wells) for each concentration tested. The Probpos  
514 effect for a compound concentration was tabulated by averaging the top third of rank ordered  
515 fields. Outlier fields with high Probpos values were visually inspected and eliminated if artifacts  
516 (segmentation errors or debris) were observed. Cells treated with known fluorescence drugs  
517 including Clofazimine, were confirmed to not have spectral interference. Dose response curves  
518 were fit with Graphpad Prism using a semilog 4-parameter variable slope model.

519

520

521

522

523

524

525

526

527

528

529 **FIGURES AND LEGENDS**

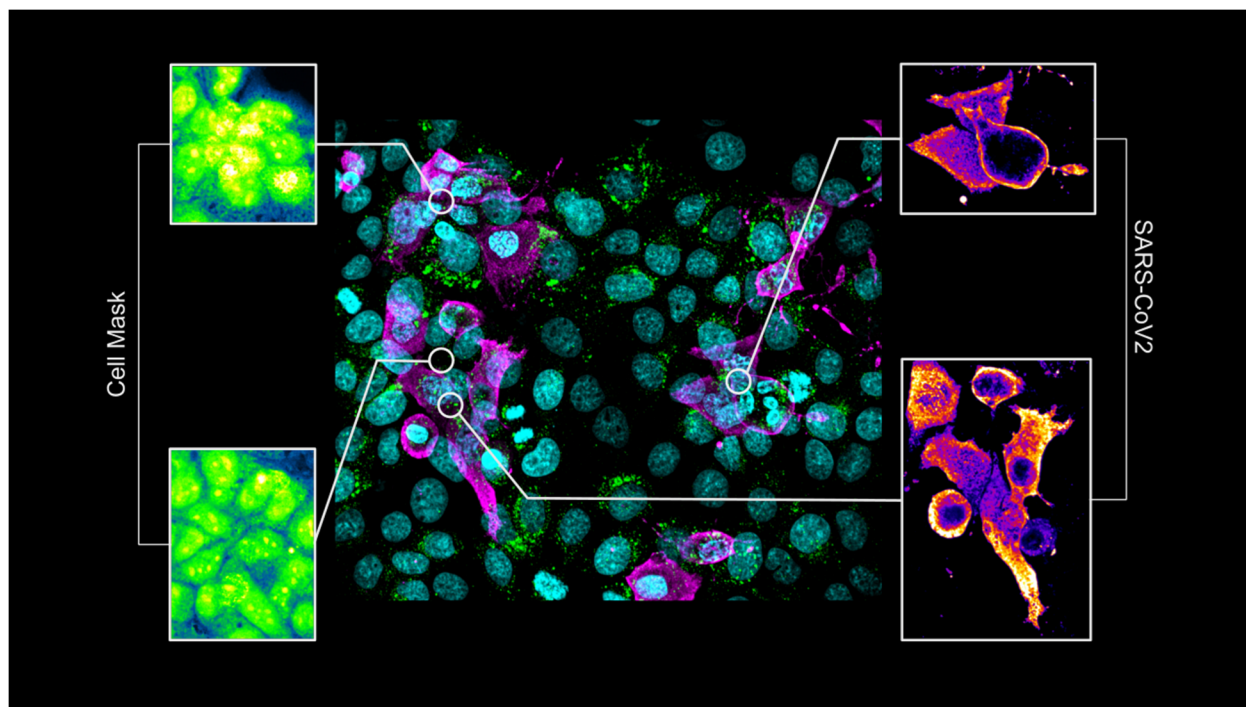

531 **Figure 1.** Morphological profiling of SARS-CoV-2 infected Huh-7 cells (MOI of 0.2 for 48 hrs).  
532 Center image: representative field with nuclei (cyan), neutral lipids (green), and SARS-CoV-2 NP  
533 protein (magenta). Through feature extraction key traits of SARS-CoV-2 infection were  
534 characterized with multinucleated syncytia (top left) and abundant nucleoli (bottom left) from HCS  
535 CellMask Orange channel. Cell viral compartmentalization (top right) with cytoplasmic protrusions  
536 (bottom right) from SARS-CoV-2 NP channel. Representative image was acquired on a  
537 Yokogawa CQ1 high-content imager and visualized with Fiji ImageJ package.

538

539

540

541

542

543

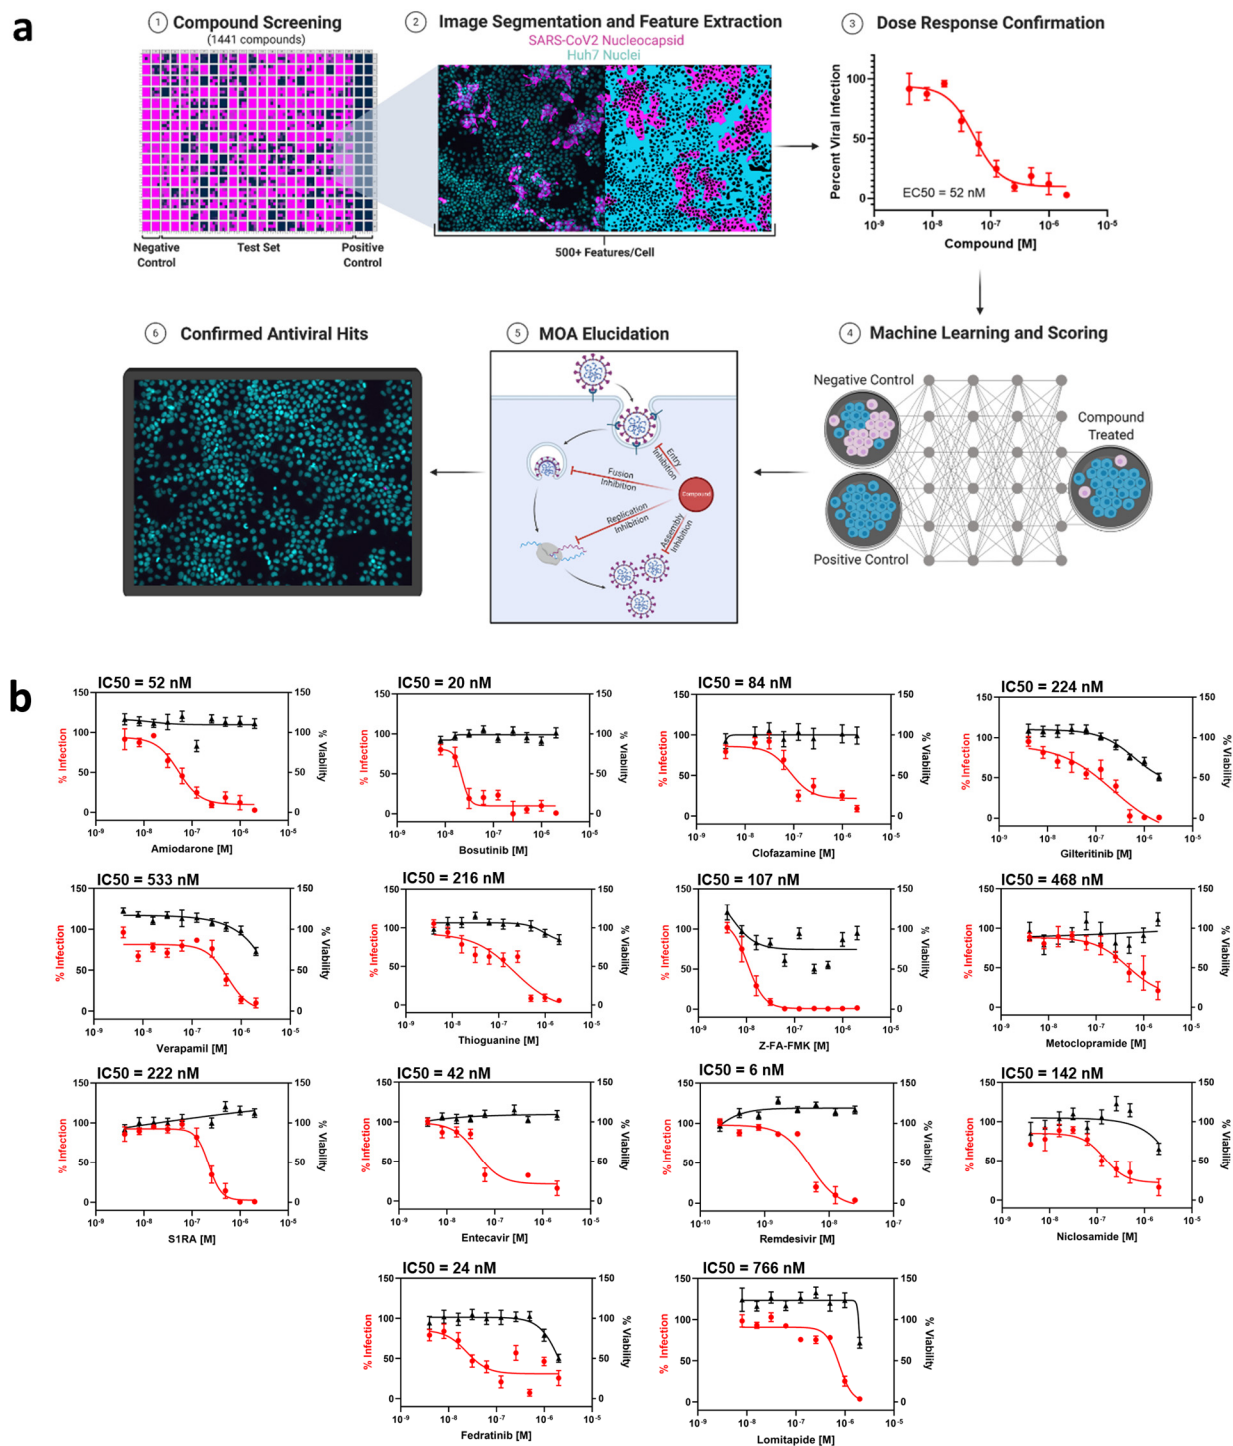

549 a Cell Profiler-based pipeline which segments nuclei, cell boundaries, neutral lipid content and  
550 viral syncytia formation while extracting features of these cellular compartments. 3) Dose-  
551 response curves are calculated through multivariate-analysis to define per-image viral infectivity  
552 4) Machine learning models are built around positive and negative control wells based on  
553 extracted features and applied to each drug condition. 5) Models inform on individual compound  
554 mode(s) of antiviral action through obtained features 6) confirmed antiviral hits; b) Dose-response  
555 curves of 15 hits of the drug screening. Graphs represent median SEM of 10-point 1:2 dilution  
556 series of selected compounds for N=3 biological replicates. IC<sub>50</sub> were calculated based on  
557 normalization to the control and after fitting in GraphPad Prism.

558

559

560

561

562

563

564

565

566

567

568

569

570

571

572

573

574



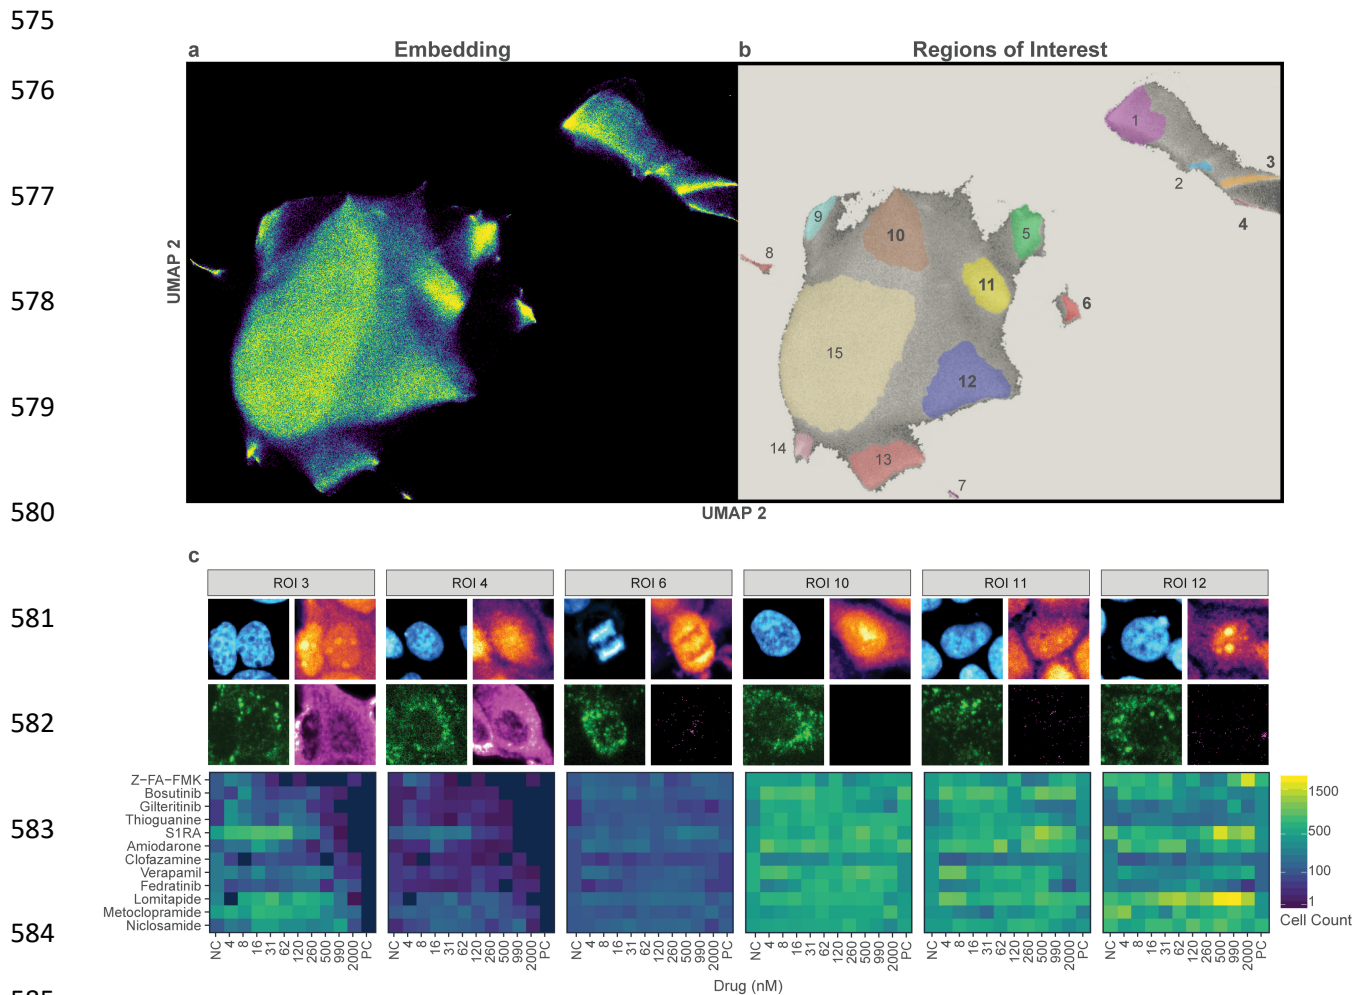

586 **Figure 3.** a) 2 dimensional UMAP embedding of two million individual cells by 379 morphological  
587 features consisting of uninfected (PC), infected (NC), or infected and treated with 12 FDA  
588 approved and clinical candidate drug screening hits across 10 doses. b) Cluster regions of interest  
589 (ROI) in the UMAP are highlighted including infected syncytial (ROI 3) and isolated (ROI 4) cells  
590 and non-infected mitotic (ROI 6), normal (ROI 10), scattered lipid (ROI 11), and cytoplasm  
591 punctate (ROI 12) cells. c) For six ROIs, a representative cell is shown by nuclear (upper-left),  
592 cell boundary (upper-right), neutral lipid (lower-left), and SARS-CoV-2 nucleocapsid (lower-right)  
593 channels. Below, the cell count across each treatment and dose is shown as a heat-map, where  
594 the dose-responsive behavior for ROIs 3 and 4 are visible.

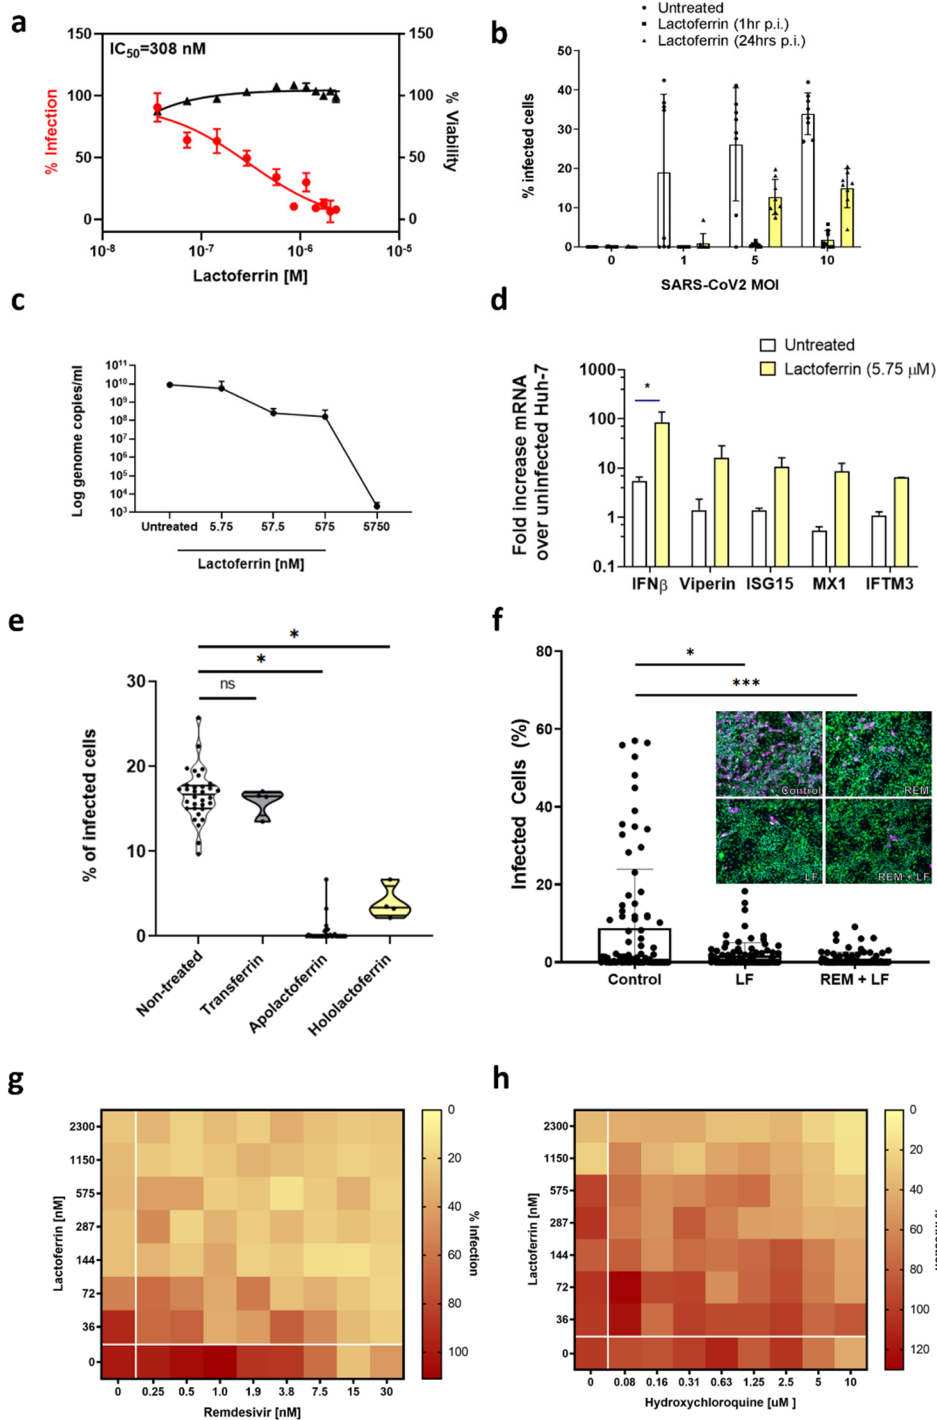

595  
596 **Figure 4.** Lactoferrin blocks SARS-CoV-2 replication at different stages of the viral cycle. a) Huh-  
597 7 cells were treated with lactoferrin (0 to 2.3  $\mu\text{M}$ ) and infected with SARS-CoV-2 (MOI of 0.2) in a  
598 384-well plate. Plates were imaged using automated fluorescence microscopy and processed

599 using our image analysis pipeline to determine percent viral inhibition. Graph indicates a dose-  
600 response (RED,  $IC_{50} = 308 \mu\text{M}$ ). Cell viability is depicted in black. b) Huh-7 were infected with  
601 SARS-CoV-2 (MOI of 1, 5 and 10; MOI of 0 indicates non-infected cells) and treated with  $2.3 \mu\text{M}$   
602 of Lactoferrin at 1 and 24hrs p.i. Bars indicate the percentage of infected cells in different  
603 conditions. Data is an average of 8 replicates. Statistical significance determined using multiple  
604 T-test with the Bonferroni-Dunn method, with  $\alpha = 0.05$ . Except for MOI of 0, all conditions  
605 (Untreated vs Lactoferrin, 1 hr or Untreated vs Lactoferrin, 24 hr) differ at  $P < 0.0001$ . c-d)  $2.5 \times 10^4$   
606 Huh-7 cells were infected with SARS-CoV-2 at MOI of 0.2. 48 hrs p.i., cells were harvested and  
607 RNA was extracted. Viral genome copies were calculated with an absolute quantification method  
608 (standard curve) (c) and mRNA levels of cellular  $IFN\beta$ , MX1, ISG15 and IFITM3 (d) were  
609 calculated with  $\Delta\Delta\text{Ct}$  over non-infected Huh-7. Data are average, SD of N=2 biological replicates  
610 with n=3 technical replicates each. Statistical significance determined using multiple T-test with  
611 the Bonferroni-Dunn method, with  $\alpha = 0.05$ . \* $P < 0.001$ . e) Percentage of SARS-CoV-2 infected  
612 Huh-7 cells upon treatment with apolactoferrin, hololactoferrin, and transferrin at a concentration  
613 of  $2.3 \mu\text{M}$ . f) Percentage of infected iAEC2 48 hrs p.i. at MOI of 10 upon treatment with remdesivir  
614 ( $50 \text{ nM}$ ), lactoferrin ( $1.2 \mu\text{M}$ ), and remdesivir/lactoferrin ( $25 \text{ nM}/600 \text{ nM}$ ) combination treatment.  
615 Error bars shown are SEM. Significance was calculated using Kruskal-Wallis test followed by  
616 Dunn's multiple comparison test. \* $P < 0.05$  and \*\*\* $P < 0.001$ . g) and h) 2-dimensional dose response  
617 heat maps of lactoferrin (0 to  $2.3 \mu\text{M}$ ) in combination with remdesivir and hydroxychloroquine (0  
618 to  $30 \text{ nM}$  and 0 to  $10 \mu\text{M}$ , respectively). Remdesivir combination was evaluated with a 0.2 MOI  
619 and HCQ was evaluated with a MOI of 10 leading to a relative shift in lactoferrin potency.

620

621

622

623

624 **SUPPLEMENTARY INFORMATION**

625 Supplementary Figure 1: Screening assay optimization

626 Supplementary Figure 2: Compounds exacerbating SARS-CoV2 infection

627 Supplementary Figure 3: Features of UMAP regions of interest (ROI)

628 Supplementary Figure 4: Combinatory effects of remdesivir and hydroxychloroquine with  
629 lactoferrin

630 Supplementary Table 1: Compound Deep Dives

631 Supplementary File 1: Compound library details

632 Supplementary File 2: 3D reconstruction video of infected cells

633

634

635

636

637

638

639

640

641

642

643

644

645

646

647

648

649

650 **REFERENCES**

- 651 1. Xiao, F. *et al.* Evidence for Gastrointestinal Infection of SARS-CoV-2. *Gastroenterology*  
652 (2020). doi:10.1053/j.gastro.2020.02.055
- 653 2. Lin, L. *et al.* Gastrointestinal symptoms of 95 cases with SARS-CoV-2 infection. *Gut*  
654 (2020). doi:10.1136/gutjnl-2020-321013
- 655 3. Avula, A. *et al.* COVID-19 presenting as stroke. *Brain. Behav. Immun.* (2020).  
656 doi:10.1016/j.bbi.2020.04.077
- 657 4. Kochi, A. N., Tagliari, A. P., Forleo, G. B., Fassini, G. M. & Tondo, C. Cardiac and  
658 arrhythmic complications in patients with COVID-19. *Journal of Cardiovascular*  
659 *Electrophysiology* (2020). doi:10.1111/jce.14479
- 660 5. Mulangu, S. *et al.* A randomized, controlled trial of Ebola virus disease therapeutics. *N.*  
661 *Engl. J. Med.* (2019). doi:10.1056/NEJMoa1910993
- 662 6. Oprea, T. I. *et al.* Drug repurposing from an academic perspective. *Drug Discovery*  
663 *Today: Therapeutic Strategies* (2011). doi:10.1016/j.ddstr.2011.10.002
- 664 7. Chu, H. *et al.* Comparative tropism, replication kinetics, and cell damage profiling of  
665 SARS-CoV-2 and SARS-CoV with implications for clinical manifestations, transmissibility,  
666 and laboratory studies of COVID-19: an observational study. *The Lancet Microbe* (2020).  
667 doi:10.1016/s2666-5247(20)30004-5
- 668 8. Hoffmann, M. *et al.* SARS-CoV-2 Cell Entry Depends on ACE2 and TMPRSS2 and Is  
669 Blocked by a Clinically Proven Protease Inhibitor. *Cell* (2020).  
670 doi:10.1016/j.cell.2020.02.052
- 671 9. Riva, L. *et al.* A Large-scale Drug Repositioning Survey for SARS-CoV-2 Antivirals.  
672 *bioRxiv* (2020). doi:10.1101/2020.04.16.044016
- 673 10. Katie Heiser *et al.* Identification of potential treatments for COVID-19 through artificial  
674 intelligence enabled phenomic analysis of human cells infected with SARS-CoV-2.  
675 *bioRxiv* (2020). doi:10.1101/2020.04.21.054387

- 676 11. Jeon, S. *et al.* Identification of antiviral drug candidates against SARS-CoV-2 from FDA-  
677 approved drugs. *Antimicrob. Agents Chemother.* (2020). doi:10.1128/AAC.00819-20
- 678 12. McInnes, L., Healy, J., Saul, N. & Großberger, L. UMAP: Uniform Manifold Approximation  
679 and Projection. *J. Open Source Softw.* (2018). doi:10.21105/joss.00861
- 680 13. Lang, J. *et al.* Inhibition of SARS pseudovirus cell entry by lactoferrin binding to heparan  
681 sulfate proteoglycans. *PLoS One* (2011). doi:10.1371/journal.pone.0023710
- 682 14. Siqueiros-Cendón, T. *et al.* Immunomodulatory effects of lactoferrin. *Acta*  
683 *Pharmacologica Sinica* (2014). doi:10.1038/aps.2013.200
- 684 15. Jacob, A. *et al.* Derivation of self-renewing lung alveolar epithelial type II cells from  
685 human pluripotent stem cells. *Nat. Protoc.* (2019). doi:10.1038/s41596-019-0220-0
- 686 16. Hurley, K. *et al.* Reconstructed Single-Cell Fate Trajectories Define Lineage Plasticity  
687 Windows during Differentiation of Human PSC-Derived Distal Lung Progenitors. *Cell*  
688 *Stem Cell* (2020). doi:10.1016/j.stem.2019.12.009
- 689 17. Yeni, P. Update on HAART in HIV. in *Journal of Hepatology* (2006).  
690 doi:10.1016/j.jhep.2005.11.021
- 691 18. Evans, W. E. Pharmacogenetics of Thiopurine S-Methyltransferase and Thiopurine  
692 Therapy. in *Therapeutic Drug Monitoring* (2004). doi:10.1097/00007691-200404000-  
693 00018
- 694 19. Arbiser, J. L. & Moschella, S. L. Clofazimine: A review of its medical uses and  
695 mechanisms of action. *Journal of the American Academy of Dermatology* (1995).  
696 doi:10.1016/0190-9622(95)90134-5
- 697 20. Alghamdi, S., Leoncik, V., Plant, K. E. & Plant, N. J. Synergistic interaction between  
698 lipid-loading and doxorubicin exposure in Huh7 hepatoma cells results in enhanced  
699 cytotoxicity and cellular oxidative stress: Implications for acute and chronic care of obese  
700 cancer patients. *Toxicol. Res. (Camb)*. (2015). doi:10.1039/c5tx00173k
- 701 21. Hibbs, A. M. & Lorch, S. A. Metoclopramide for the treatment of gastroesophageal reflux

- 702 disease in infants: A systematic review. *Pediatrics* (2006). doi:10.1542/peds.2005-2664
- 703 22. Hajifathalian, K. *et al.* SARS-COV-2 infection (coronavirus disease 2019) for the  
704 gastrointestinal consultant. *World J. Gastroenterol.* (2020). doi:10.3748/wjg.v26.i14.1546
- 705 23. Roscow, O., Ganassin, R., Garver, K. & Polinski, M. Z-FA-FMK demonstrates differential  
706 inhibition of aquatic orthoreovirus (PRV), aquareovirus (CSRV), and rhabdovirus (IHNV)  
707 replication. *Virus Res.* (2018). doi:10.1016/j.virusres.2017.11.024
- 708 24. Ou, X. *et al.* Characterization of spike glycoprotein of SARS-CoV-2 on virus entry and its  
709 immune cross-reactivity with SARS-CoV. *Nat. Commun.* (2020). doi:10.1038/s41467-  
710 020-15562-9
- 711 25. Pardanani, A. *et al.* TG101209, a small molecule JAK2-selective kinase inhibitor potently  
712 inhibits myeloproliferative disorder-associated JAK2V617F and MPLW515L/K mutations.  
713 *Leukemia* (2007). doi:10.1038/sj.leu.2404750
- 714 26. Wu, D. & Yang, X. O. TH17 responses in cytokine storm of COVID-19: An emerging  
715 target of JAK2 inhibitor Fedratinib. *J. Microbiol. Immunol. Infect.* (2020).  
716 doi:10.1016/j.jmii.2020.03.005
- 717 27. Zhang, W. *et al.* The use of anti-inflammatory drugs in the treatment of people with  
718 severe coronavirus disease 2019 (COVID-19): The experience of clinical immunologists  
719 from China. *Clinical Immunology* (2020). doi:10.1016/j.clim.2020.108393
- 720 28. Stebbing, J. *et al.* COVID-19: combining antiviral and anti-inflammatory treatments. *The*  
721 *Lancet Infectious Diseases* (2020). doi:10.1016/S1473-3099(20)30132-8
- 722 29. Treatment of Moderate to Severe Coronavirus Disease (COVID-19) in Hospitalized  
723 Patients. (2020). Available at: <https://clinicaltrials.gov/ct2/show/NCT04321993>.
- 724 30. Delprat, B., Crouzier, L., Su, T. P. & Maurice, T. At the Crossing of ER Stress and MAMs:  
725 A Key Role of Sigma-1 Receptor? in *Advances in Experimental Medicine and Biology*  
726 (2020). doi:10.1007/978-3-030-12457-1\_28
- 727 31. Friesland, M., Mingorance, L., Chung, J., Chisari, F. V. & Gastaminza, P. Sigma-1

- 728 Receptor Regulates Early Steps of Viral RNA Replication at the Onset of Hepatitis C  
729 Virus Infection. *J. Virol.* (2013). doi:10.1128/jvi.03557-12
- 730 32. Fung, T. S. & Liu, D. X. Coronavirus infection, ER stress, apoptosis and innate immunity.  
731 *Frontiers in Microbiology* (2014). doi:10.3389/fmicb.2014.00296
- 732 33. Moebius, F. F., Reiter, R. J., Hanner, M. & Glossmann, H. High affinity of sigma1-binding  
733 sites for sterol isomerization inhibitors: Evidence for a pharmacological relationship with  
734 the yeast sterol C8-C7 isomerase. *Br. J. Pharmacol.* (1997). doi:10.1038/sj.bjp.0701079
- 735 34. Díaz, J. L. *et al.* Synthesis and biological evaluation of the 1-arylpyrazole class of  $\sigma_1$   
736 receptor antagonists: Identification of 4-{2-[5-methyl-1-(naphthalen-2-yl)-1H-pyrazol-3-  
737 yloxy]ethyl}morpholine (S1RA, E-52862). *J. Med. Chem.* (2012). doi:10.1021/jm3007323
- 738 35. Torres, V. *et al.* QT prolongation and the antiarrhythmic efficacy of amiodarone. *J. Am.*  
739 *Coll. Cardiol.* (1986). doi:10.1016/S0735-1097(86)80272-8
- 740 36. Vidal-Torres, A. *et al.* Effects of the selective sigma-1 receptor antagonist S1RA on  
741 formalin-induced pain behavior and neurotransmitter release in the spinal cord in rats. *J.*  
742 *Neurochem.* (2014). doi:10.1111/jnc.12648
- 743 37. Gris, G. *et al.* The selective sigma-1 receptor antagonist E-52862 attenuates neuropathic  
744 pain of different aetiology in rats. *Sci. Rep.* (2016). doi:10.1038/srep24591
- 745 38. Gordon, D. E. *et al.* A SARS-CoV-2 protein interaction map reveals targets for drug  
746 repurposing. *Nature* (2020). doi:10.1038/s41586-020-2286-9
- 747 39. Reghunathan, R. *et al.* Expression profile of immune response genes in patients with  
748 severe acute respiratory syndrome. *BMC Immunol.* (2005). doi:10.1186/1471-2172-6-2
- 749 40. Cutone, A. *et al.* Lactoferrin prevents LPS-induced decrease of the iron exporter  
750 ferroportin in human monocytes/macrophages. *BioMetals* (2014). doi:10.1007/s10534-  
751 014-9742-7
- 752 41. Conti, P. *et al.* Induction of pro-inflammatory cytokines (IL-1 and IL-6) and lung  
753 inflammation by COVID-19: anti-inflammatory strategies. *Journal of biological regulators*



- 754            *and homeostatic agents* (2020). doi:10.23812/CONTI-E.
- 755    42.    Lagunas-Rangel, F. A. & Chávez-Valencia, V. High IL-6/IFN- $\gamma$  ratio could be associated  
756            with severe disease in COVID-19 patients. *Journal of Medical Virology* (2020).  
757            doi:10.1002/jmv.25900
- 758    43.    Han, C. *et al.* Digestive Symptoms in COVID-19 Patients With Mild Disease Severity:  
759            Clinical Presentation, Stool Viral RNA Testing, and Outcomes. *Am. J. Gastroenterol.*  
760            (2020). doi:10.14309/ajg.0000000000000664
- 761    44.    Oda, H. *et al.* Antiviral Effects of Bovine Lactoferrin on Human Norovirus. *Biochem. Cell*  
762            *Biol.* (2020). doi:10.1139/bcb-2020-0035
- 763    45.    Mohamed, J. A. *et al.* A Novel Single-Nucleotide Polymorphism in the Lactoferrin Gene Is  
764            Associated with Susceptibility to Diarrhea in North American Travelers to Mexico. *Clin.*  
765            *Infect. Dis.* (2007). doi:10.1086/512199
- 766    46.    Gu, J., Han, B. & Wang, J. COVID-19: Gastrointestinal Manifestations and Potential  
767            Fecal–Oral Transmission. *Gastroenterology* (2020). doi:10.1053/j.gastro.2020.02.054
- 768    47.    Hung, I. F.-N. *et al.* Triple combination of interferon beta-1b, lopinavir–ritonavir, and  
769            ribavirin in the treatment of patients admitted to hospital with COVID-19: an open-label,  
770            randomised, phase 2 trial. *Lancet* (2020). doi:10.1016/s0140-6736(20)31042-4
- 771    48.    Berthold, M. R. *et al.* KNIME: The konstanz information miner. in *4th International*  
772            *Industrial Simulation Conference 2006, ISC 2006* (2006). doi:10.1007/978-3-540-78246-  
773            9\_38
- 774    49.    Stevens, J.-L., Rudiger, P. & Bednar, J. HoloViews: Building Complex Visualizations  
775            Easily for Reproducible Science. in *Proceedings of the 14th Python in Science*  
776            *Conference* (2015). doi:10.25080/majora-7b98e3ed-00a
- 777
